# Supplementary material for: Cardiometabolic Disease Staging Predicts Effectiveness of Weight-Loss Therapy to Prevent Type 2 Diabetes: Pooled Results From Phase III Clinical Trials Assessing Phentermine/Topiramate Extended Release
Source: Oxford University Press journal article supplement (doi:10.2337/dc17-0088), 2017-04-28
Supplement: dc170088supplementarydata.pdf [file dc170088supplementarydata.pdf]

## SUPPLEMENTARY DATA

**Supplementary Table 1.** Algorithm to calculate weighted CMDS score.

| Items                                                                                                        | CMDS Score |
|--------------------------------------------------------------------------------------------------------------|------------|
| Fasting glucose $\geq 100$ mg/dL and $< 126$ mg/dL                                                           | 30         |
| Waist circumference ( $\geq 102$ cm in men, $\geq 88$ cm in women)*                                          | 33         |
| Blood pressure (systolic $\geq 130$ mmHg and/or diastolic $\geq 85$ mmHg) or on anti-hypertensive medication | 22         |
| HDL cholesterol ( $< 40$ mg/dL in men; $< 50$ mg/dL in women)                                                | 7          |
| Fasting triglycerides $\geq 150$ mg/dL or on anti-hyperlipidemia medication                                  | 8          |
| Total (range 0 to 100 possible)=                                                                             |            |

CMDS: Cardiometabolic Disease Staging; HDL: High-density lipoprotein.

\*: Elevated waist circumference was not treated as a risk factor in participants with BMI  $\geq 35$  kg/m<sup>2</sup>.

Fasting glucose  $\geq 100$  mg/dL ( $\geq 5.6$  mmol/L) and  $< 126$  mg/dL ( $< 7.0$  mmol/L).

HDL cholesterol  $< 40$  mg/dL ( $< 1.0$  mmol/L) in men;  $< 50$  mg/dL ( $< 1.3$  mmol/L) in women.

Fasting triglycerides  $\geq 150$  mg/dL ( $\geq 1.7$  mmol/L).

## SUPPLEMENTARY DATA

**Supplementary Table 2.** Distribution of CMDS score in overweight and obese adults in the United States, NHANES 2013-2014.

|                       | Number in millions |       |      |
|-----------------------|--------------------|-------|------|
|                       | 0-29               | 30-59 | 60 + |
| <b>All</b>            | 29.3               | 53.2  | 46.6 |
| <b>Age group</b>      |                    |       |      |
| 20-39 y               | 16.7               | 23.3  | 8.9  |
| 40-59 y               | 9.7                | 21.8  | 20.4 |
| 60+ y                 | 2.9                | 8.2   | 17.3 |
| <b>Gender</b>         |                    |       |      |
| Male                  | 17.6               | 24    | 23.5 |
| Female                | 11.7               | 29.3  | 23.1 |
| <b>Race/Ethnicity</b> |                    |       |      |
| Non-Hispanic White    | 17.7               | 34.8  | 34.8 |
| Non-Hispanic Black    | 5.3                | 6.6   | 3.8  |
| Mexican American      | 3.1                | 6.2   | 3.6  |
| Other                 | 3.1                | 5.7   | 4.4  |

\* 0-29: Participants who had a CMDS score in the range of 0-29.
